1 **Title Page**

2 Title: Intra-Host Mutation Rate of Acute SARS-CoV-2 Infection During the Initial Pandemic Wave

3

| <b>Authors</b>          | <b>Affiliation</b>                                                                               |
|-------------------------|--------------------------------------------------------------------------------------------------|
| Kim El-Haddad, MD       | Center for Pediatric Infectious Disease, Cleveland Clinic Children's, Cleveland, Ohio            |
| Thamali M Adhikari MS   | Department of Computer and Data Sciences, Case Western Reserve University, Cleveland, Ohio       |
| Tu Zheng Jin, PhD       | Robert J. Tomsich Pathology and Laboratory Medicine Institute, Cleveland Clinic, Cleveland, Ohio |
| Yu-Wei Cheng, PhD       | Robert J. Tomsich Pathology and Laboratory Medicine Institute, Cleveland Clinic, Cleveland, Ohio |
| Xiaoyi Leng, BS         | Department of Computer and Data Sciences, Case Western Reserve University, Cleveland, Ohio       |
| Xiangyi Zhang, BS       | Department of Computer and Data Sciences, Case Western Reserve University, Cleveland, Ohio       |
| Daniel Rhoads, MD       | Robert J. Tomsich Pathology and Laboratory Medicine Institute, Cleveland Clinic, Cleveland, Ohio |
| Jennifer S. Ko MD, PhD  | Robert J. Tomsich Pathology and Laboratory Medicine Institute, Cleveland Clinic, Cleveland, Ohio |
| Sarah Worley, M.S.      | Department of Quantitative Health Sciences, Cleveland Clinic, Cleveland, Ohio                    |
| Jing Li, PhD            | Department of Computer and Data Sciences, Case Western Reserve University, Cleveland, Ohio       |
| Brian P. Rubin, MD, PhD | Robert J. Tomsich Pathology and Laboratory Medicine Institute, Cleveland Clinic, Cleveland, Ohio |
| Frank P. Esper, MD      | Center for Pediatric Infectious Disease, Cleveland Clinic Children's, Cleveland, Ohio            |

4

5 **Running title:** SARS-CoV-2 Intra-Host Mutation

6 **Abstract:** 199 words

7 **Manuscript Text:** 3395 words

8 **References:** 45

9 **Tables:** 2

10 **Figures:** 2

11 **Supplementary Tables:** 2

12 **Supplementary Figures:** 3

14 **Conflicts of interest:**

15 DDR performs collaborative research that is sponsored by industry collaborators: BD, bioMerieux,  
16 Cepheid, Cleveland Diagnostics, Hologic, Luminex, Q-Linea, Qiagen, Roche, Specific  
17 Diagnostics, Thermo Fisher, and Vela. DDR is or has been on advisory boards for Luminex, Talis  
18 Biomedical, and Thermo Fisher. FE has served as a consultant to Proctor & Gamble. The  
19 remaining authors have or do not have an association that might pose a conflict of interest.

20

21 **Funding:** This research was supported through the Ellen and Steven Ross Fellowship Research  
22 Award, Cleveland Clinic Children's. This project was supported in part by NSF IIS-2027667 and  
23 NSF CCF-2200255 (JL and FE), NSF CCF-2006780 (JL), NSF CCF-1815139 (JL), and through  
24 unrestricted funds from the Robert J. Tomsich Pathology and Laboratory Medicine Institute.

25

26

27

28

29

30

31

32

33

34

35

36

37

38 **Corresponding author:**

39 Kim El Haddad, MD

40 Address: R3, 9500 Euclid Avenue, Cleveland, Ohio 44195 USA

41 Email: [elhaddk@ccf.org](mailto:elhaddk@ccf.org)

42 Phone number: 216-218-4845

43 Fax: 216-636-3405

44

45 **Alternative Corresponding author:**

46 Frank Esper, MD

47 Address: R3, 9500 Euclid Avenue, Cleveland, Ohio 44195 USA

48 Email: [esperf@ccf.org](mailto:esperf@ccf.org)

49 Phone number: 216-372-5918

50 Fax: 216-636-3405

51

52

53 Keywords: SARS-CoV-2, COVID-19, evolution, mutation rate, allele frequency, NSP-14, SNV

54

55 **Abstract**

56 **Background:** Our understanding of SARS-CoV-2 evolution and mutation rate is limited. The  
57 rate of SARS-CoV-2 evolution is minimized through a proofreading function encoded by *NSP-*  
58 *14* and may be affected by patient comorbidity. Current understanding of SARS-CoV-2  
59 mutational rate is through population based analysis while intra-host mutation rate remains  
60 poorly studied.

61  
62 **Methods:** Viral genome analysis was performed between paired samples and mutations  
63 quantified at allele frequencies (AF)  $\geq 0.25$ ,  $\geq 0.5$  and  $\geq 0.75$ . Mutation rate was determined  
64 employing F81 and JC69 evolution models and compared between isolates with ( $\Delta$ NSP-14) and  
65 without (wtNSP-14) non-synonymous mutations in NSP-14 and by patient comorbidity.

66  
67 **Results:** Forty paired samples with median interval of 13 days [IQR 8.5-20] were analyzed. The  
68 estimated mutation rate by F81 modeling was 93.6 (95%CI:90.8-96.4), 40.7 (95%CI:38.9-42.6)  
69 and 34.7 (95%CI:33.0-36.4) substitutions/genome/year at AF  $\geq 0.25$ ,  $\geq 0.5$ ,  $\geq 0.75$  respectively.  
70 Mutation rate in  $\Delta$ NSP-14 were significantly elevated at AF $>0.25$  vs wtNSP-14. Patients with  
71 immune comorbidities had higher mutation rate at all allele frequencies.

72  
73 **Discussion:** Intra-host SARS-CoV-2 mutation rates are substantially higher than those reported  
74 through population analysis. Virus strains with altered NSP-14 have accelerated mutation rate at  
75 low AF. Immunosuppressed patients have elevated mutation rate at all AF. Understanding intra-  
76 host virus evolution will aid in current and future pandemic modeling.

77 **Background:**

78 Since the introduction of the SARS-CoV-2 pandemic in 2020, over 102 million cases have been  
79 reported within the United States (1). During this time, multiple variants have emerged  
80 associated with alteration in clinical outcomes, disease severity and transmission dynamics (2).  
81 SARS-CoV-2 rate of mutation are commonly estimated through inferring substitution rate matrix  
82 based on phylogenetic tree using maximum likelihood methods through analysis of global  
83 databases comprised of unrelated virus sequences submitted ad hoc(3,4) .This population-based  
84 rate began at a modest 21.9 substitutions/genome/year in the initial months but has steadily risen  
85 over the course of the pandemic where it is now estimated at ~28.4 substitutions/genome/year  
86 (5). However, viral mutation rate during the course of the infection remains poorly understood  
87 with few studies describing intra-host kinetics.

88 Analysis of SARS-CoV-2 mutations within a host during the course of an infection have been  
89 highly variable and are affected by sequencing protocols and data analysis parameters( i.e.  
90 variant-calling) (6,7). The mutation rate of SARS-CoV-2 genome is slower than most RNA  
91 viruses predominantly through the action of nonstructural protein 14 (NSP-14) (8). NSP-14 is  
92 present in all coronaviruses and contains an *N*-terminal ExoN domain providing replication  
93 fidelity for the RNA dependent RNA polymerase important for viral replication and transcription  
94 (9–11). Mutagenesis of NSP-14 enzymatic activity is thought to have significant impact on  
95 increased genomic mutation diversity (12). ExoN inactivation was shown to create a “mutator  
96 phenotype,” leading to a 15- to 21-fold rise in mutations during replication in cell culture but  
97 may adversely affect viral fitness (10).Additionally, viral mutagenesis is reported to be

98 influenced by host comorbidities (13). Subsequently, there is concern that novel variants eliciting  
99 immune escape emerge within immunocompromised hosts following prolonged infection (7).

100 To better understand the mutation capacity of SARS-CoV-2, we perform analysis of paired  
101 samples and calculate the intra-host mutation rate with further examination of the effects of  
102 altered NSP-14 and host comorbidity. Better insight on this viruses ability to evolve has  
103 importance for both current and future coronavirus pandemics (14).

#### 104 **Methods:**

##### 105 **Sample Identification and collection**

106 Patient samples were identified through The Cleveland Clinic Pathology and Laboratory  
107 Medicine Institute (PLMI) SARS-CoV-2 variant surveillance project(2). Selected samples  
108 focused on the period of the initial pandemic wave between 3/17/2020 and 5/27/2020. This  
109 period was chosen as treatment was limited and immune-preventative strategies (e.g.  
110 immunizations, monoclonal antibodies) against SARS-CoV-2 were not available. Additionally,  
111 SARS-CoV-2 re-infection was unlikely during this period. Hence, the mutation rate analysis is  
112 unlikely to be influenced by these external factors.

113 Adults age  $\geq 18$  years with multiple positive nasopharyngeal samples occurring within 5 to 60  
114 days of initial screening were identified. This interval time frame was selected to prevent  
115 skewing of model results from short sampling intervals while further minimizing chance of re-  
116 infection with different SARS-CoV-2 strains (15,16). Only pairings where initial and subsequent  
117 samples had cycle threshold (CT)  $\leq 30$  were included to ensure high quality genomic  
118 sequencing. Children  $<18$  years were excluded as identification of SARS-CoV-2 in children

119 during the first wave was minimal. Those specimens with an indeterminate result, obtained from  
120 locations other than the nasopharynx, or whose samples contained discordant viral lineages  
121 (suggesting reinfection) were also excluded.

122 Patient comorbidities were identified through the COVID-19 registry (17). Patients were  
123 classified into four comorbidity categories: Endocrine (obesity and diabetes mellitus), cardiac  
124 (hypertension and coronary artery disease), pulmonary (asthma, obstructive sleep apnea and  
125 COPD) and immunologic (autoimmune diseases, history of prior/ current cancer and current  
126 immunosuppression therapy). Sample collection and medical review is approved by the Internal  
127 Review Board at Cleveland Clinic.

#### 128 **Library preparation and sequence data analysis:**

129 Following patient identification, initial and subsequent nasopharyngeal samples were retrieved  
130 from Biobank freezers housed at PLMI and processed for viral genome analysis through next  
131 generation sequencing (NGS). Total nucleic acids were purified from each specimen and subjected  
132 to reverse transcription (RT), NGS library preparation, sequencing, and data analysis according to  
133 the manufacturer's recommendation (Paragon Genomics, Hayward CA). Briefly: Total RNA from  
134 SARS-CoV-2 was converted into complementary deoxyribonucleic acid (cDNA) synthesis via RT  
135 in 20  $\mu$ L reactions (10 minutes at 8°C and 80 minutes at 42°C). The derived panel of 343 amplicons  
136 utilized for SARS-CoV-2 enrichment covers 99.7% of the viral genome  
137 (MN908947/NC\_045512.2) with 92 bases uncovered at each end. Purified cDNA was subject to  
138 multiplex PCR (10 minutes at 95°C, followed by 10 cycles at 98 °C for 15 seconds each and 60  
139 °C for 5 minutes). Excess primers and oligos were subsequently removed from the purified PCR  
140 products, after which a second round of PCR to append indexing primers was performed (initial

141 denaturation, 10 minutes at 95°C, followed by 24 cycles of 98°C for 15 seconds and 60°C for 75  
142 seconds). Sequencing libraries were then prepared and quality was assessed visually using an  
143 Agilent® 2100 Bioanalyzer® (Agilent, Santa Clara CA). The presence of a ~275 bp peak indicated  
144 successful amplification and these libraries were then sequenced using a MiSeq instrument  
145 (Illumina, San Diego, CA). Raw fastq reads was extracted by Illumina bcl2fastq (v2.20.0) and  
146 mapped to the reference genome Wuhan-Hu- 1 (NC\_045512.2) using BWA program (18).  
147 Variants were called using FreeBayes program (19) and filtered at 5% and 10% allele fractions for  
148 insertion or deletion (INDEL) and single nucleotide variants (SNV), respectively. Amino acid  
149 changes were annotated using snpEff (v4.5) program (20). All variant data was visually examined  
150 in Integrative Genome Browser (IGV, version 2.11.0) (21) to eliminate artifacts. Quality was  
151 ensured by monitoring mapping quality, phred score, and manual review.

## 152 **Variant Calling**

153 Variant calling methodology is strongly dependent on the library protocol and sequencing  
154 technology and requires tuning of parameters to distinguish true variants from false positive calls  
155 (22) . Variant calling was expanded from established WHO criteria (23) and was performed by  
156 manual review of each SNV by three independent investigators through IGV (21). We used a  
157 minimum depth of  $\geq 100$  reads at each position for all samples and quantified SNV at 3 separate  
158 allele frequencies ( $AF \geq 0.25$ ,  $AF \geq 0.5$ , and  $AF \geq 0.75$ ). AF was defined as the proportion of SNV  
159 in the sample reads. Mutation change represents the discordance in SNVs between initial and the  
160 subsequent samples at each AF. In addition, SNVs below 0.25 AF and those mutations where  
161 investigator consensus was not achieved were excluded from the analysis to ensure no  
162 overestimation of mutation rate. Following classification of mutation (missense, silent, nonsense,



163 INDEL) and location within the genome, isolates with non-synonymous mutations of NSP-14  
164 were identified and placed in the  $\Delta$ NSP-14 group. As our understanding of SARS-CoV-2 NSP-  
165 14 is evolving, no weight was given to mutation types (Missense vs frameshift vs nonsense) or  
166 location within NSP-14 (active vs structural site). Changes in genome between initial and  
167 subsequent samples were quantified for each pair and used for calculation of mutation rate  
168 (standardized to mutations/genome/year) through both F81 and JC69 models (below).

### 169 **Calculation of Genome Mutation rate:**

170 We chose two mutation models (F81 and JC69) in calculating the overall substitution rates  
171 between samples (24,25) as sample size was limited and both models assume equal mutation  
172 rates across different nucleotides allowing for a smaller number of model parameters. JC69 also  
173 assumes equal base frequencies, whereas F81 allows for variable base frequencies with equal  
174 substitutions providing a more realistic calculation of the mutation rate. For both models,  
175 mutation rates were estimated by the use of maximum likelihood algorithms. Hereafter, the  
176 results detail findings from the F81 model while results detailing findings from the JC69 analysis  
177 appear in the supplementary materials.

### 178 **F81 model derivation:**

179 For each of the  $n$  patients, we obtained two virus specimens at different time points and the time  
180 interval is denoted as  $t_k$  for patient  $k$ . To obtain the maximum likelihood estimate of the mutation  
181 rate based on the evolutionary model F81, we assume all the patients are independent. Therefore,  
182 the likelihood of the data ( $L$ ) is the product of the likelihood ( $L_k$ ) of each patient  $k$ , measuring the  
183 probability of observing the sequence evolving over time  $t_k$ . Because for each patient, both initial

184 and subsequent sequences were available, under the assumption that all the nucleotides are  
185 independent, the probability  $L_k$  is the product of the probability over all nucleotides. Under the  
186 model F81, the probability that a nucleotide  $i$  ( $i \in \{A, T, G, C\}$ ) remains unchanged over time  $t$  is

187 
$$P_{ii}(\mu t) = e^{-\mu t} + p_i(1 - e^{-\mu t})$$

188 and the probability of a nucleotide  $i$  to change to a nucleotide  $j$  over time  $t$  is

189 
$$P_{ij}(\mu t) = p_j(1 - e^{-\mu t})$$

190 where  $u$  is the mutation rate per nucleotide per year, and  $p_i$  is the frequency of nucleotide  $i$ . Let  
191  $l_{(ij),k}$  denote the number of nucleotide  $i$  changed to nucleotide  $j$  for patient  $k$  (in the case of  $i$  is the  
192 same as  $j$ , the nucleotide remains unchanged), the overall likelihood can thus be represented as

193 
$$L = \prod_{k=1}^n L_k = \prod_{k=1}^n \prod_{i=A}^T \prod_{j=A}^T [p_{ik} \cdot P_{ij}(\mu t_k)]^{l_{(ij),k}}$$

194 where  $p_{ik}$  is the frequency of nucleotide  $i$  in the first specimen of the  $k^{\text{th}}$  patient (in practice, these  
195 frequencies are very similar to the frequencies from the SARS-CoV2 reference sequence). The  
196 log likelihood is

197 
$$l = \log(L) = C + \sum_{k=1}^n \sum_{i=A}^T \sum_{j=A}^T l_{(ij),k} \log(P_{ij}(\mu t_k))$$

198 The maximum likelihood estimate cannot be obtained analytically. We relied on the Newton-  
199 Raphson method (26), which iteratively updates the new value of the mutation rate  $u$  until  
200 convergence.

201 The detailed derivations for both F81 and JC69 models can be found in the supplementary  
202 methods.

203

#### 204 **Statistical analysis**

205 Continuous variables were described using median and range; categorical variables were  
206 described using frequency and percentage. Demographics and variant characteristics were  
207 compared between patients in different virus groups by using ANOVA or Wilcoxon rank sum  
208 tests for continuous variables and Fisher's exact or Pearson's chi-square tests for categorical  
209 variables. The estimated mutation rates from two different groups are compared using the t-test,  
210 assuming the maximum likelihood estimates follow approximately a normal distribution. The  
211 confidence interval of the estimated mutation rate is calculated based on the maximum likelihood  
212 estimate following approximately a normal distribution  $N(u, 1/I(u))$ , where  $u$  is the true value,  
213 and  $I(u)$  is the Fisher information. PRISM software (version 8.4.3, GraphPad Software, San  
214 Diego, CA) and Python (version 3.7.4) with statsmodel package (version 0.13.2, for construction  
215 of ML models) was used for analysis.

#### 216 **Results:**

217 From 3/17/2020 through 5/27/2020, a total of 40 paired nasopharyngeal samples (initial and  
218 subsequent) from acutely infected individuals with SARS-CoV-2 were identified and retrieved  
219 from the COVID19 biobank. Median days between paired tests was 13 days [IQR 8.5-20].  
220 Median patient age was 54 years [IQR 31, 66] and included 20/40(50.0%) males with 26/40  
221 (67.0%) being white, and with 28/40 (70.0%) having at least one comorbidity (table 1).

222 Comorbidities included endocrine 23/40 (57.5%), cardiac 17/40 (42.5%), pulmonary 8/40  
223 (20.0%) and Immune/Oncologic 6/40 (15.0%).

224 SARS-CoV-2 genomes of each pair were sequenced and mapped against the reference Wuhan  
225 strain (Wuhan-Hu-1, NC\_045512.2). SNVs were identified for each pairing through IGV and  
226 filtered at allele frequencies (AF)  $\geq 0.25$ ,  $\geq 0.5$  and  $\geq 0.75$ . A total of 120 SNVs changes between  
227 initial and subsequent samples were identified at AF  $\geq 0.25$ , 53 at AF  $\geq 0.5$  and 33 at AF  $\geq 0.75$   
228 (table 2). The majority of SNV changes were gained over the course of the infection (93/120  
229 (77.5%), 32/53 (60.4%), 18/33 (54.8%) at AF  $\geq 0.25$ ,  $\geq 0.5$ ,  $\geq 0.75$  respectively) with the  
230 remainder being lost (27/120 (22.5%), 21/53 (39.6%), 15/33 (45.2%) at AF  $\geq 0.25$ ,  $\geq 0.5$ ,  $\geq 0.75$ ).  
231 Predominant SNVs were missense with most occurring in the ORF1a/b region and the spike  
232 protein region. While more SNVs were gained at low AF, there was no substantial difference  
233 between SNV types or gene location among different AF.

234 We identified 12/40 (30.0%) pairs with a non-synonymous mutation in NSP-14 ( $\Delta$ NSP-14) while  
235 28/40 patients (70.0%) did not (wtNSP-14). Median age, gender, race and comorbidities were  
236 similar between both groups. For both  $\Delta$ NSP-14 and wtNSP-14 groups, the majority of SNVs  
237 were gained over the course of infection in both groups. Mutation types and locations were  
238 similar between groups (supplementary table 1 and 2).

239 Mutation rates were calculated through the F81 and JC69 models (figure 1, supplementary figure  
240 1 for JC69). Focusing on F81 modeling, the mutation rate from all samples was found to be 93.6  
241 substitutions/genome/year [95%CI 90.8-96.4] at AF  $\geq 0.25$ , 40.7 [95% CI 38.9-42.6] at AF  $\geq 0.5$   
242 and 34.7 [95%CI 33.0-36.4] at AF  $\geq 0.75$ . Mutation rate of  $\Delta$ NSP-14 were significantly higher at  
243 low AF compared to wtNSP-14 group (109.4 [95%CI 99.7-119.1] vs 86.0 [95%CI 82.1-89.9])

244 substitutions/genome/year, p-value <0.001). Surprisingly, mutation rate was lower in  $\Delta$ NSP-14  
245 compared to wtNSP-14 both at AF  $\geq 0.5$  (32.0 [95% CI 26.8-37.2] vs 44.9 [95% CI 42.1-47.7]  
246 substitutions/genome/year, p-value <0.001) and at AF  $\geq 0.75$  (16.0 [95% CI 7.0-25.1] vs 39.8  
247 [95% CI 25.0-54.5] substitutions/genome/year, p-value <0.001).

248 Lastly, patients with underlying immunologic/oncologic comorbidities had a substantially higher  
249 mutation rate than other comorbidities at all three AF (figure 2, supplementary figure 2 for  
250 JC69). Mutation rate in patients with immunologic/oncologic comorbidities was 160 [95% CI  
251 136.2-183.7] vs 81.2 [95% CI 78.1- 84.2] substitutions/genome/year at AF  $\geq 0.25$ , 137.9 [95% CI  
252 115.8-160.0] vs 22.6 [95% CI 21.0-24.2] at AF  $\geq 0.5$  and 126.9 [95% CI 105.7-148.0] vs 17.4  
253 [95%CI 16.0-18.9] at AF  $\geq 0.75$ . Overall mutation rates calculated through JC69 modeling were  
254 comparable to those with F81 at all three AF (supplementary figure 3). Results based on JC69  
255 modeling are presented in Supplementary Figures 1 and 2.

## 256 **Discussion:**

257 The dynamics of SARS-CoV-2 evolution remain poorly understood. The virus continues to  
258 change leading to the emergence of new variants adversely affecting pandemic response (27).

259 The mutation rate commonly cited is calculated through analysis of unrelated regional and global  
260 sequences. These population based rates have ranged from 21.6 to 28.4  
261 substitutions/genome/year (5). The rate of evolution of SARS-CoV-2 for much of 2020 was  
262 consistent with the virus acquiring approximately two mutations per month (28,29). However,  
263 recently the viral mutation rate has accelerated and now lies at its fastest point with the  
264 emergence of the Omicron variant (30).

265 Here, we analyze intra-host mutation rate at multiple allele frequencies to better characterize and  
266 understand the capacity for SARS-CoV-2 to evolve following its initial introduction and prior to  
267 external influence by antivirals, vaccinations and prior immunity. While intra-host mutation  
268 dynamics have been previously described (31), the intra-host mutation rate over the course of an  
269 infection, important for predicting future variant development has been poorly studied. We find  
270 the intra-host mutation rate is over 50% greater than what was reported through population based  
271 surveillance at  $AF \geq 0.75$  (the WHO standard). Additionally, if low frequency SNVs ( $< 0.75$ ) act  
272 as a reservoir for further generation of dominant mutations, the mutation rate can be up to 80%  
273 higher at  $AF \geq 0.5$  and nearly 350% greater at  $AF \geq 0.25$ . Recognition of this mutation potential  
274 aids in our understanding of current evolutionary patterns and provides useful clues for future  
275 coronavirus pandemics (32,33).

276 By analyzing the genomic changes at lower AF, our study provides a better appreciation of intra-  
277 host SARS-CoV-2 biodiversity. We find the highest diversity at lowest AF ( $\geq 0.25$ )  
278 demonstrating that potential SNVs occur nearly 4 times higher than commonly reported. Fitness  
279 of these low frequency SNVs and their effect on transmission remains poorly understood.

280 Current literature is skeptical of significant person to person spread of low AF SNVs and report  
281 only rare transmission recognized among individuals within the same household (6,7,34).

282 However, it is reported that accelerated episodic increase in mutation rate ( $\sim 4$  fold higher than  
283 the background substitution rate) drive the emergence of variants of concerns(35). We  
284 hypothesize that low AF SNVs may play a role in such a process.

285 Prior studies report that alteration in NSP-14 is associated with increased mutation load across  
286 the genome compared to other NSP changes (36). NSP-14 is vital for survival of various

287 coronaviruses including SARS-CoV-2 (37). Inactivating NSP-14-ExoN in murine hepatitis virus  
288 (MHV-CoV) significantly altered recombination patterns and decreased recombination  
289 frequency compared with wild-type MHV-CoV (10). While virus diversity has been found to  
290 contribute to disease severity in coronaviruses including SARS-CoV-1 and MERS-CoV (32),  
291 further studies showed ExoN knockout mutants of MERS-CoV and SARS-CoV-2 are nonviable,  
292 suggesting excess mutation may have a deleterious effect (11,38). Our findings are consistent  
293 with this. While the mutation rate is significantly higher in  $\Delta$ NSP-14, such change occurs only at  
294 low AF. This suggests SARS-CoV-2 viruses with altered NSP-14 may be less fit (37). As such,  
295 SARS-CoV-2 NSP-14 is being evaluated as a potential therapeutic target (10,12).

296 Lastly, SARS-CoV-2 genetic diversity and clinical outcome are influenced by host effects (33).  
297 High rates of mutation over short time periods have been seen in previous studies of  
298 immunosuppressed individuals chronically infected with SARS-CoV-2. (39–41). Additionally,  
299 prolonged viral shedding can occur in the immunocompromised population allowing for  
300 increased time to generate fit mutations (42). In one example, SARS-CoV-2 shedding was  
301 observed for as long as 471 days from the upper respiratory tract of a patient suffering from  
302 advanced lymphocytic leukemia and B-cell lymphoma. Throughout the course of this infection  
303 the accumulation of an unusually high number of immune escape mutations was detected and the  
304 mutation rate was calculated at 35.6 (95% CI: 31.6-39.5) substitutions per year through the  
305 Bayesian Skyline Model (43). In our study, we included patients with several comorbidities,  
306 only viruses originating from hosts with immune comorbidities were found to have significantly  
307 accelerated mutation rate (44). This adds to the growing understanding that a patient's immunity

308 profile impacts viral evolution over the course of the infection (43). Better delineation of specific  
309 immune factors associated with alteration of evolutionary rate are needed.

310

311 There are several limitations to this study. First, while our investigation of 40 SARS-CoV-2  
312 patient pairs demonstrated substantially higher mutation rate than commonly reported, further  
313 analysis with larger cohorts would improve accuracy. Similarly, patients were grouped in broad  
314 comorbidity categories rather than by more specific underlying disease. Studies with greater  
315 characterization of underlying comorbidities, particularly immune, will provide a better picture  
316 of host factors associated with alteration in SARS-CoV-2 mutation (42,45). While a cutoff AF  $\geq$   
317 0.75 was based on WHO guide for global variant surveillance, the significance of lower  
318 frequency SNVs remains unclear. This study sheds more light on the virus diversity identified at  
319 lower AF thresholds. By focusing analysis on viral isolates originating from the initial pandemic  
320 wave, ours is the first study to determine the intra-host mutation rate of SARS-CoV-2 prior to the  
321 influence of many external factors (e.g. antiviral medications, monoclonal antibody therapy,  
322 immunization, and natural immunity from prior infection). Determining the effect of  
323 pharmacologic interventions, immunization and previous infection on the mutation rate of  
324 subsequent SARS-CoV-2 isolates is a logical next step. Additionally, analysis of subsequent  
325 SARS-CoV-2 variants (Alpha, Delta, and Omicron) with parameter rich models such as HKY or  
326 GTR are currently being planned. Lastly, placement of patients within wt and  $\Delta$ NSP-14 groups  
327 occurred without association to gene location or type. It is possible that several NS mutations  
328 placed in this group did not substantially affect NSP-14 function. Further study focusing on  
329 those SNVs with a defined effect on NSP-14 activity are needed (45).



330 **Conclusion:**

331 Our study demonstrates the intra-host mutation rate of SARS-CoV-2 is substantially higher than  
332 previously reported through population based analysis. In addition, low frequency intra-host  
333 mutations may be an important reservoir contributing to possible future variant emergence.  
334 SNVs in NSP-14 were found to have increased mutation rate but only at low AF. Conversely, we  
335 find enhanced mutation rate in immunocompromised patients while no elevation was observed in  
336 patients with underlying cardiac, pulmonary or endocrine comorbidities. SARS-CoV-2 intra-host  
337 dynamics have crucial implications on current and future pandemic planning, development of  
338 vaccines, and antiviral therapy.

339

340 **References**

- 341 1. CDC. COVID Data Tracker [Internet]. Centers for Disease Control and Prevention. 2020  
342 [cited 2023 Feb 20]. Available from: <https://covid.cdc.gov/covid-data-tracker>
- 343 2. Esper FP, Cheng YW, Adhikari TM, Tu ZJ, Li D, Li EA, et al. Genomic Epidemiology of SARS-  
344 CoV-2 Infection During the Initial Pandemic Wave and Association With Disease Severity.  
345 JAMA Netw Open. 2021 Apr 1;4(4):e217746.
- 346 3. Hadfield J, Megill C, Bell SM, Huddleston J, Potter B, Callender C, et al. Nextstrain: real-time  
347 tracking of pathogen evolution. Kelso J, editor. Bioinformatics. 2018 Dec 1;34(23):4121–3.
- 348 4. Mercatelli D, Holding AN, Giorgi FM. Web tools to fight pandemics: the COVID-19  
349 experience. Brief Bioinform. 2021 Mar 22;22(2):690–700.
- 350 5. Nextstrain. Nextstrain / ncov / gisaid / global / 6m [Internet]. [cited 2023 Feb 6]. Available  
351 from: <https://nextstrain.org/ncov/gisaid/global/6m?l=clock>
- 352 6. Lythgoe KA, Hall M, Ferretti L, de Cesare M, MacIntyre-Cockett G, Trebes A, et al. SARS-CoV-  
353 2 within-host diversity and transmission. Science. 2021 Apr 16;372(6539):eabg0821.

- 354 7. Braun KM, Moreno GK, Wagner C, Accola MA, Rehrauer WM, Baker DA, et al. Acute SARS-  
355 CoV-2 infections harbor limited within-host diversity and transmit via tight transmission  
356 bottlenecks. *PLoS Pathog*. 2021 Aug;17(8):e1009849.
- 357 8. Robson F, Khan KS, Le TK, Paris C, Demirbag S, Barfuss P, et al. Coronavirus RNA  
358 Proofreading: Molecular Basis and Therapeutic Targeting. *Mol Cell*. 2020 Sep 3;79(5):710–  
359 27.
- 360 9. Ma Y, Wu L, Shaw N, Gao Y, Wang J, Sun Y, et al. Structural basis and functional analysis of  
361 the SARS coronavirus nsp14-nsp10 complex. *Proc Natl Acad Sci U S A*. 2015 Jul  
362 28;112(30):9436–41.
- 363 10. Tahir M. Coronavirus genomic nsp14-ExoN, structure, role, mechanism, and potential  
364 application as a drug target. *J Med Virol*. 2021 Jul;93(7):4258–64.
- 365 11. Ogando NS, Zevenhoven-Dobbe JC, van der Meer Y, Bredenbeek PJ, Posthuma CC, Snijder  
366 EJ. The Enzymatic Activity of the nsp14 Exoribonuclease Is Critical for Replication of MERS-  
367 CoV and SARS-CoV-2. Gallagher T, editor. *J Virol*. 2020 Nov 9;94(23):e01246-20.
- 368 12. Hsu JCC, Laurent-Rolle M, Pawlak JB, Wilen CB, Cresswell P. Translational shutdown and  
369 evasion of the innate immune response by SARS-CoV-2 NSP14 protein. *Proc Natl Acad Sci U*  
370 *S A*. 2021 Jun 15;118(24):e2101161118.
- 371 13. Wang R, Hozumi Y, Zheng YH, Yin C, Wei GW. Host Immune Response Driving SARS-CoV-2  
372 Evolution. *Viruses*. 2020 Sep 27;12(10):E1095.
- 373 14. Zhao Z, Li H, Wu X, Zhong Y, Zhang K, Zhang YP, et al. [No title found]. *BMC Evol Biol*.  
374 2004;4(1):21.
- 375 15. Li W, Su YY, Zhi SS, Huang J, Zhuang CL, Bai WZ, et al. Virus shedding dynamics in  
376 asymptomatic and mildly symptomatic patients infected with SARS-CoV-2. *Clin Microbiol*  
377 *Infect*. 2020 Nov;26(11):1556.e1-1556.e6.
- 378 16. Shrestha NK, Marco Canosa F, Nowacki AS, Procop GW, Vogel S, Fraser TG, et al.  
379 Distribution of Transmission Potential During Nonsevere COVID-19 Illness. *Clin Infect Dis*.  
380 2020 Dec 31;71(11):2927–32.
- 381 17. Jehi L, Ji X, Milinovich A, Erzurum S, Rubin BP, Gordon S, et al. Individualizing Risk Prediction  
382 for Positive Coronavirus Disease 2019 Testing: Results From 11,672 Patients. *Chest*. 2020  
383 Oct;158(4):1364–75.
- 384 18. Wang Y, Wang D, Zhang L, Sun W, Zhang Z, Chen W, et al. Intra-host variation and  
385 evolutionary dynamics of SARS-CoV-2 populations in COVID-19 patients. *Genome Med*.  
386 2021 Feb 22;13(1):30.

- 387 19. Garrison E, Marth G. Haplotype-based variant detection from short-read sequencing.  
388 arXiv:12073907 [q-bio] [Internet]. 2012 Jul 20 [cited 2022 Apr 27]; Available from:  
389 <http://arxiv.org/abs/1207.3907>
- 390 20. Cingolani P, Platts A, Wang LL, Coon M, Nguyen T, Wang L, et al. A program for annotating  
391 and predicting the effects of single nucleotide polymorphisms, SnpEff: SNPs in the genome  
392 of *Drosophila melanogaster* strain w1118; iso-2; iso-3. *Fly (Austin)*. 2012 Jun;6(2):80–92.
- 393 21. Robinson JT, Thorvaldsdóttir H, Winckler W, Guttman M, Lander ES, Getz G, et al.  
394 Integrative genomics viewer. *Nat Biotechnol*. 2011 Jan;29(1):24–6.
- 395 22. Koboldt DC. Best practices for variant calling in clinical sequencing. *Genome Med*. 2020  
396 Dec;12(1):91.
- 397 23. World Health Organization. Genomic sequencing of SARS-CoV-2: a guide to implementation  
398 for maximum impact on public health, 8 January 2021 [Internet]. Geneva: World Health  
399 Organization; 2021 [cited 2022 Jun 8]. 80 p. Available from:  
400 <https://apps.who.int/iris/handle/10665/338480>
- 401 24. Felsenstein J. Evolutionary trees from DNA sequences: A maximum likelihood approach. *J*  
402 *Mol Evol*. 1981 Nov;17(6):368–76.
- 403 25. Jukes TH, Cantor CR. Evolution of Protein Molecules. In: *Mammalian Protein Metabolism*  
404 [Internet]. Elsevier; 1969 [cited 2022 Jun 8]. p. 21–132. Available from:  
405 <https://linkinghub.elsevier.com/retrieve/pii/B9781483232119500097>
- 406 26. Nocedal J, Wright SJ. Numerical optimization. 2. ed. New York, NY: Springer; 2006. 664 p.  
407 (Springer series in operation research and financial engineering).
- 408 27. Thakur S, Sasi S, Pillai SG, Nag A, Shukla D, Singhal R, et al. SARS-CoV-2 Mutations and Their  
409 Impact on Diagnostics, Therapeutics and Vaccines. *Front Med*. 2022 Feb 22;9:815389.
- 410 28. Duchene S, Featherstone L, Haritopoulou-Sinanidou M, Rambaut A, Lemey P, Baele G.  
411 Temporal signal and the phylodynamic threshold of SARS-CoV-2. *Virus Evolution*. 2020 Jul  
412 1;6(2):veaa061.
- 413 29. Worobey M, Pekar J, Larsen BB, Nelson MI, Hill V, Joy JB, et al. The emergence of SARS-CoV-  
414 2 in Europe and North America. *Science*. 2020 Oct 30;370(6516):564–70.
- 415 30. Kim S, Nguyen TT, Taitt AS, Jhun H, Park HY, Kim SH, et al. SARS-CoV-2 Omicron Mutation Is  
416 Faster than the Chase: Multiple Mutations on Spike/ACE2 Interaction Residues. *Immune*  
417 *Netw*. 2021 Dec;21(6):e38.
- 418 31. Valesano AL, Rumfelt KE, Dimcheff DE, Blair CN, Fitzsimmons WJ, Petrie JG, et al. Temporal  
419 dynamics of SARS-CoV-2 mutation accumulation within and across infected hosts. *bioRxiv*.  
420 2021 Jan 20;2021.01.19.427330.

- 421 32. Al Khatib HA, Benslimane FM, Elbashir IE, Coyle PV, Al Maslamani MA, Al-Khal A, et al.  
422 Within-Host Diversity of SARS-CoV-2 in COVID-19 Patients With Variable Disease Severities.  
423 *Front Cell Infect Microbiol.* 2020 Oct 6;10:575613.
- 424 33. Li J, Du P, Yang L, Zhang J, Song C, Chen D, et al. Two-step fitness selection for intra-host  
425 variations in SARS-CoV-2. *Cell Reports.* 2022 Jan;38(2):110205.
- 426 34. Shen Z, Xiao Y, Kang L, Ma W, Shi L, Zhang L, et al. Corrigendum to: Genomic Diversity of  
427 Severe Acute Respiratory Syndrome–Coronavirus 2 in Patients With Coronavirus Disease  
428 2019. *Clinical Infectious Diseases.* 2021 Dec 16;73(12):2374–2374.
- 429 35. Tay JH, Porter AF, Wirth W, Duchene S. The Emergence of SARS-CoV-2 Variants of Concern  
430 Is Driven by Acceleration of the Substitution Rate. *Mol Biol Evol.* 2022 Feb 3;39(2):msac013.
- 431 36. Eskier D, Suner A, Oktay Y, Karakulah G. Mutations of SARS-CoV-2 nsp14 exhibit strong  
432 association with increased genome-wide mutation load. *PeerJ.* 2020;8:e10181.
- 433 37. Takada K, Ueda MT, Watanabe T, Nakagawa S. Genomic diversity of SARS-CoV-2 can be  
434 accelerated by a mutation in the nsp14 gene [Internet]. *Microbiology*; 2020 Dec [cited 2022  
435 Jun 17]. Available from: <http://biorxiv.org/lookup/doi/10.1101/2020.12.23.424231>
- 436 38. Niu X, Kong F, Hou YJ, Wang Q. Crucial mutation in the exoribonuclease domain of nsp14 of  
437 PEDV leads to high genetic instability during viral replication. *Cell Biosci.* 2021  
438 Dec;11(1):106.
- 439 39. Avanzato VA, Matson MJ, Seifert SN, Pryce R, Williamson BN, Anzick SL, et al. Case Study:  
440 Prolonged Infectious SARS-CoV-2 Shedding from an Asymptomatic Immunocompromised  
441 Individual with Cancer. *Cell.* 2020 Dec 23;183(7):1901-1912.e9.
- 442 40. Sonnleitner ST, Prelog M, Sonnleitner S, Hinterbichler E, Halbfurter H, Kopecky DBC, et al.  
443 Cumulative SARS-CoV-2 mutations and corresponding changes in immunity in an  
444 immunocompromised patient indicate viral evolution within the host. *Nat Commun.* 2022  
445 Dec;13(1):2560.
- 446 41. Leung WF, Chorlton S, Tyson J, Al-Rawahi GN, Jassem AN, Prystajecy N, et al. COVID-19 in  
447 an immunocompromised host: persistent shedding of viable SARS-CoV-2 and emergence of  
448 multiple mutations: a case report. *International Journal of Infectious Diseases.* 2022  
449 Jan;114:178–82.
- 450 42. Nussenblatt V, Roder AE, Das S, de Wit E, Youn JH, Banakis S, et al. Year-long COVID-19  
451 infection reveals within-host evolution of SARS-CoV-2 in a patient with B cell depletion.  
452 *medRxiv.* 2021 Oct 5;2021.10.02.21264267.
- 453 43. Chaguzza C, Hahn AM, Petrone ME, Zhou S, Ferguson D, Breban MI, et al. Accelerated SARS-  
454 CoV-2 intrahost evolution leading to distinct genotypes during chronic infection [Internet].

455 Infectious Diseases (except HIV/AIDS); 2022 Jul [cited 2022 Jul 18]. Available from:  
456 <http://medrxiv.org/lookup/doi/10.1101/2022.06.29.22276868>

457 44. Choudhary MC, Crain CR, Qiu X, Hanage W, Li JZ. Severe Acute Respiratory Syndrome  
458 Coronavirus 2 (SARS-CoV-2) Sequence Characteristics of Coronavirus Disease 2019 (COVID-  
459 19) Persistence and Reinfection. *Clinical Infectious Diseases*. 2022 Jan 29;74(2):237–45.

460 45. Becares M, Pascual-Iglesias A, Nogales A, Sola I, Enjuanes L, Zuñiga S. Mutagenesis of  
461 Coronavirus nsp14 Reveals Its Potential Role in Modulation of the Innate Immune  
462 Response. *J Virol*. 2016 Jun 1;90(11):5399–414.

463

464

465

466

#### 467 **Figure Legends:**

468 **Figure 1. F81 Mutation Modeling by Allele Frequency with and without alteration in NSP-**

469 **14.** Graphic representation of F81 evolution modeling at AF  $\geq 0.25$ ,  $\geq 0.5$ ,  $\geq 0.75$  of A) total

470 patient sample and B) comparison between wt and  $\Delta$ NSP-14. Bars represent 95%CI. Table

471 displaying data for F81 modeling is displayed below. P-values displayed represent comparison of

472 wt and  $\Delta$ NSP-14 groups.

473 **Figure 2. F81 Mutation Clock Modeling by Allele Frequency with Respect to Age and**

474 **Comorbidity.** Graphic representations of mutation rates at AF  $\geq 0.25$ ,  $\geq 0.5$ ,  $\geq 0.75$  for A) age and

475 comorbidities and B) those with and without immunologic/oncologic comorbidity. Bars

476 represent 95%CI. Table displaying data for F81 modeling is displayed below.

477 **Authors contributions:**

478 K E H, FE, and BR conceptualized and directed this research. TA, XL, XZ and JL, developed  
479 methodology, and performed evolutionary modeling and mutation statistics. TJ and YC assisted  
480 in sample acquisition, Illumina sequencing and pipeline development. DR and JK assisted in study  
481 design, sample identification and acquisition. SW assisted in statistics review. All authors  
482 contributed to discussions and manuscript preparation.

483

484 **Acknowledgments:**

485 We appreciate Daniel H. Farkas, PhD, for his kind insight and thoughtful review of the project.

486

487

# Tables and Figures

Table 1. Patient Demographics of Paired SARS-CoV-2 Isolates

|                                     | Total        | wt NSP-14    | Δ NSP-14     | p-value           |
|-------------------------------------|--------------|--------------|--------------|-------------------|
| <b>Total pairs</b>                  | 40           | 28 (70.0%)   | 12 (30.0%)   |                   |
| <b>Median interval (days) [IQR]</b> | 13 [8.5, 20] | 13 [8.5, 20] | 14 [8.5, 20] | 0.72 <sup>b</sup> |
| <b>Demographics</b>                 |              |              |              |                   |
| <b>Median Age (yr) [IQR]</b>        | 54 [31, 66]  | 56 [31, 69]  | 53 [32, 62]  | 0.65 <sup>b</sup> |
| <b>Males</b>                        | 20 (50.0%)   | 14 (50.0%)   | 6 (50.0%)    | 0.99 <sup>c</sup> |
| <b>Race*</b>                        |              |              |              | 0.46 <sup>d</sup> |
| <b>White</b>                        | 26 (67.0%)   | 16 (59.0%)   | 10 (83.3%)   |                   |
| <b>African American</b>             | 10 (26.0%)   | 8 (30.0%)    | 2 (16.7%)    |                   |
| <b>Asian</b>                        | 3 (7.5%)     | 3 (11.0%)    | 0 (0%)       |                   |
| <b>Comorbidity</b>                  |              |              |              |                   |
| <b>Any</b>                          | 28 (70.0%)   | 19 (67.9%)   | 9 (75.0%)    | 0.72 <sup>d</sup> |
| <b>Endocrine</b>                    | 23 (57.5%)   | 14 (50.0%)   | 9 (75.0%)    | 0.14 <sup>c</sup> |
| <b>Cardiac</b>                      | 17 (42.5%)   | 12 (42.9%)   | 5 (41.7%)    | 0.94 <sup>c</sup> |
| <b>Pulmonary</b>                    | 8 (20.0%)    | 5 (17.9%)    | 3 (25.0%)    | 0.68 <sup>d</sup> |
| <b>Immune/Oncologic</b>             | 6 (15.0%)    | 4 (14.3%)    | 2 (16.7%)    | 0.99 <sup>d</sup> |

\*Data not available for all subjects. Missing values: Race = 1.

Statistics presented as Median [P25, P75], N (column %).

P-values: b=Wilcoxon Rank Sum test, c=Pearson's chi-square test, d=Fisher's Exact test.



Table 2. Type and Location of SARS-CoV-2 Intra-host SNVs by Allele Fraction

|                                  | <b>AF <math>\geq</math> 0.25</b> | <b>AF <math>\geq</math> 0.5</b> | <b>AF <math>\geq</math> 0.75</b> |
|----------------------------------|----------------------------------|---------------------------------|----------------------------------|
| <b>SNV changes</b>               | 120                              | 53 (44.2%)                      | 33 (35.0%)                       |
| <b>Mutations Gained</b>          | 93 (77.5%)                       | 32 (60.4%)                      | 18 (54.8%)                       |
| <b>Mutations Lost</b>            | 27 (22.5%)                       | 21 (39.6%)                      | 15 (45.2%)                       |
| <b>Missense</b>                  | 71 (59.2%)                       | 36 (67.9%)                      | 23 (69.7%)                       |
| <b>Silent</b>                    | 30 (25.0%)                       | 11 (20.8%)                      | 7 (21.2%)                        |
| <b>INDEL</b>                     | 2 (1.6%)                         | 2 (3.8%)                        | 1 (3.0%)                         |
| <b>Other</b>                     | 17 (14.2%)                       | 4(7.5%)                         | 2 (6.1%)                         |
| <b>ORF1 a/b</b>                  | 82 (68.3%)                       | 36 (67.9%)                      | 26 (61.9%)                       |
| <b>ORF3</b>                      | 4 (3.3%)                         | 3 (5.7%)                        | 3 (7.1%)                         |
| <b>ORF6</b>                      | 2 (1.7%)                         | 1 (1.9%)                        | 1 (2.4%)                         |
| <b>ORF7</b>                      | 1 (0.8%)                         | 0 (0%)                          | 0 (0%)                           |
| <b>ORF8</b>                      | 3 (2.5%)                         | 2 (3.8%)                        | 2 (4.8%)                         |
| <b>ORF10</b>                     | 1 (0.8%)                         | 0 (0%)                          | 0 (0%)                           |
| <b>Spike</b>                     | 16 (13.3%)                       | 6 (11.3%)                       | 5 (11.9%)                        |
| <b>Membrane</b>                  | 2 (1.7%)                         | 1 (1.9%)                        | 1 (2.4%)                         |
| <b>Envelope</b>                  | 0 (0%)                           | 0 (0%)                          | 0 (0%)                           |
| <b>Nucleocapsid</b>              | 6 (5.0%)                         | 4 (7.5%)                        | 4 (9.5%)                         |
| <b>Untranslated region (UTR)</b> | 3 (2.5%)                         | 0 (0%)                          | 0 (0%)                           |

Figure 1. F81 Mutation Modeling by Allele Frequency with and without alteration in NSP-14

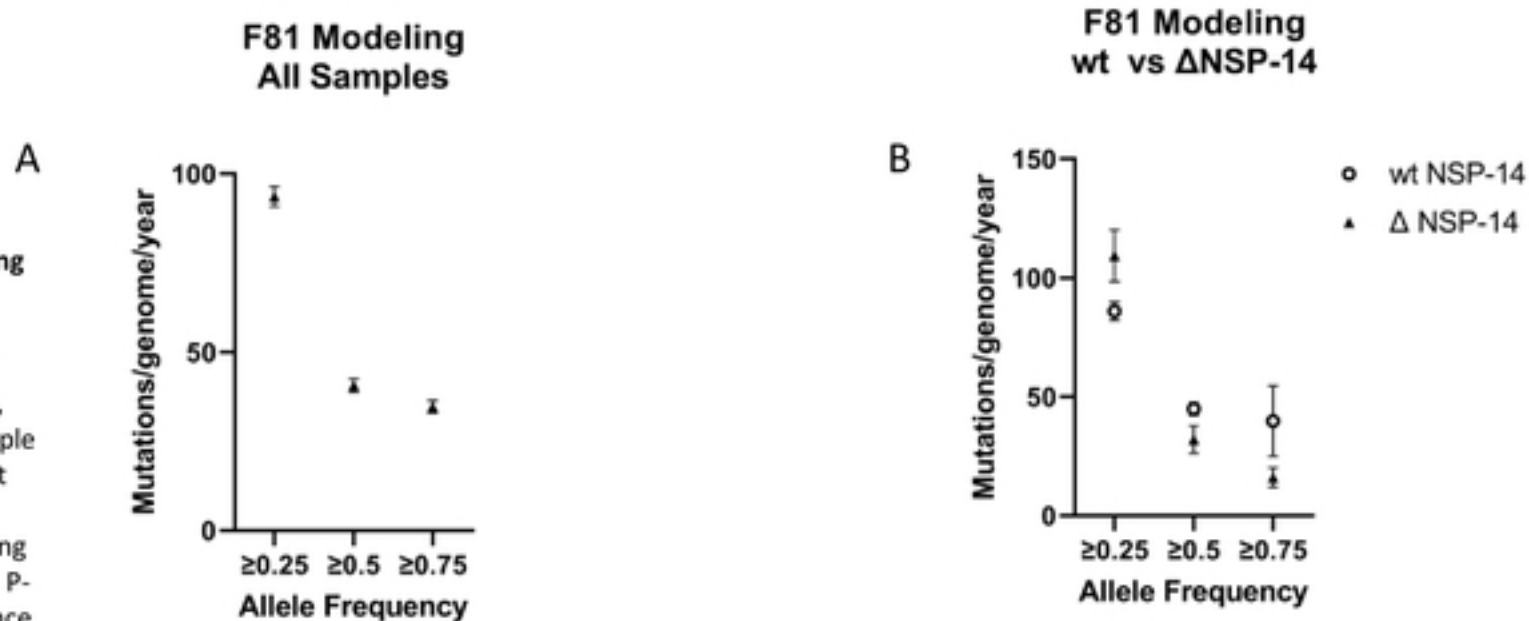

Figure 1. F81 Mutation Modeling by Allele Frequency with and without alteration in NSP-14. Graphic representation of JC69 evolution modeling at AF  $\geq 0.25$ ,  $\geq 0.5$ ,  $\geq 0.75$  of total patient sample (A) and comparison between wt and  $\Delta$ NSP-14(B). Errors bars represent 95%CI. Table displaying data for F81 modeling is below. P-values performed at a significance level of 0.05 displayed comparing wt and  $\Delta$ NSP-14.

|            | Total (n=40)                                 | wt NSP-14 (n= 28)                            | $\Delta$ NSP-14 (n=12)                       | p-value            |        |
|------------|----------------------------------------------|----------------------------------------------|----------------------------------------------|--------------------|--------|
|            | Mutation rate<br>(Subs/genome/year) [95% CI] | Mutation rate<br>(Subs/genome/year) [95% CI] | Mutation rate<br>(Subs/genome/year) [95% CI] |                    |        |
| <b>F81</b> | AF $\geq \geq 0.25$                          | 93.6 [90.8-96.4]                             | 86.0 [82.1-89.9]                             | 109.4 [99.7-119.1] | <0.001 |
|            | AF $\geq \geq 0.5$                           | 40.7 [38.9-42.6]                             | 44.9 [42.1-47.7]                             | 32.0 [26.8-37.2]   | <0.001 |
|            | AF $\geq \geq 0.75$                          | 34.7 [33.0-36.4]                             | 39.8 [25.0-54.5]                             | 16.0 [7.0-25.1]    | <0.001 |

Figure 2. F81 Mutation Clock Modeling by Allele Frequency with Respect to Age and Comorbidity

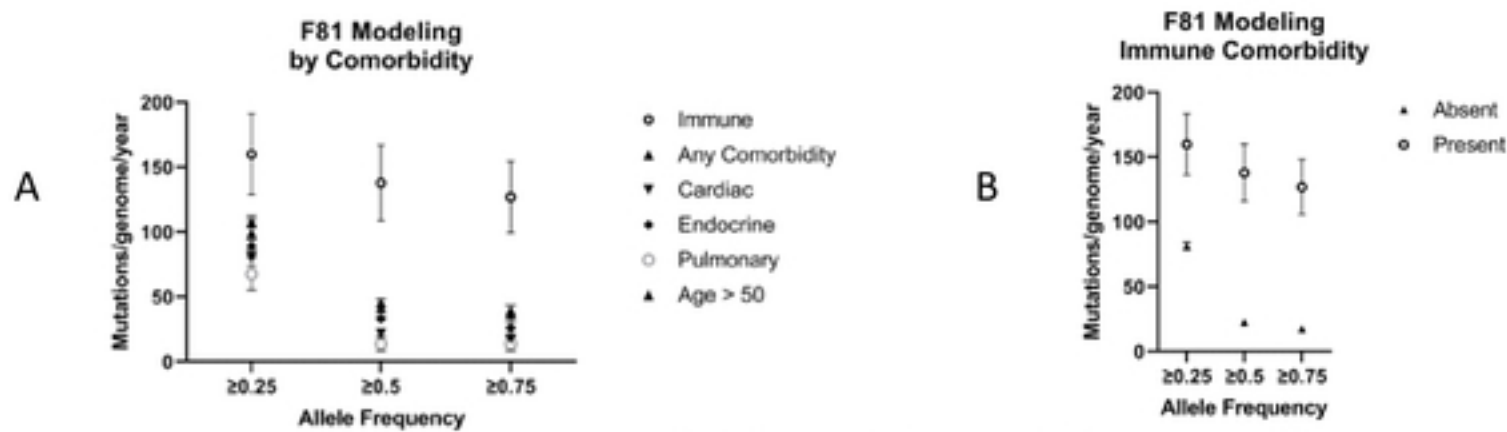

Figure 2. F81 Mutation Clock Modeling by Allele Frequency with Respect to Age and Comorbidity. Graphic representations of mutation rates at AF  $\geq 0.25$ ,  $\geq 0.5$ ,  $\geq 0.75$  for age and comorbidities (A) and for mutation rates in the presence or absence immunologic/oncologic comorbidity (B). Errors bars represent 95%CI. Table displaying data for F81 modeling is below.

|                                   | Allele Frequency | Mutation Rate (subs/genome/yr) | 95% CI      |
|-----------------------------------|------------------|--------------------------------|-------------|
| <b>Total (n=40)</b>               | AF $\geq 0.25$   | 93.6                           | 90.8-96.4   |
|                                   | AF $\geq 0.5$    | 40.7                           | 38.9-42.6   |
|                                   | AF $\geq 0.75$   | 34.7                           | 33.0-36.4   |
| <b>Age &gt; 50 (n=22)</b>         | AF $\geq 0.25$   | 99.3                           | 88.8-109.8  |
|                                   | AF $\geq 0.5$    | 41.6                           | 34.8- 48.5  |
|                                   | AF $\geq 0.75$   | 36.8                           | 30.4- 43.3  |
| <b>Medical Comorbidity (n=28)</b> | AF $\geq 0.25$   | 107.9                          | 103.4-112.3 |
|                                   | AF $\geq 0.5$    | 45.4                           | 42.5-48.2   |
|                                   | AF $\geq 0.75$   | 39.2                           | 36.6-41.2   |
| <b>Endocrine (n=23)</b>           | AF $\geq 0.25$   | 89.2                           | 84.6-93.6   |
|                                   | AF $\geq 0.5$    | 33.1                           | 30.3-35.9   |
|                                   | AF $\geq 0.75$   | 25.9                           | 23.4-28.4   |
| <b>Cardiac (n=17)</b>             | AF $\geq 0.25$   | 80.1                           | 74.2-86.1   |
|                                   | AF $\geq 0.5$    | 21.5                           | 18.4-24.6   |
|                                   | AF $\geq 0.75$   | 17.6                           | 14.8-20.4   |
| <b>Pulmonary (n=8)</b>            | AF $\geq 0.25$   | 67.54                          | 57.0-78.0   |
|                                   | AF $\geq 0.5$    | 13.5                           | 8.8-18.2    |
|                                   | AF $\geq 0.75$   | 13.5                           | 8.8-18.2    |
| <b>Immune/Oncologic (n=6)</b>     | AF $\geq 0.25$   | 160.0                          | 136.2-183.7 |
|                                   | AF $\geq 0.5$    | 137.9                          | 115.8-160.0 |
|                                   | AF $\geq 0.75$   | 126.9                          | 105.7-148.0 |
